# Supplementary material
Source: PubMed Central journal article supplement (PMC3266742)

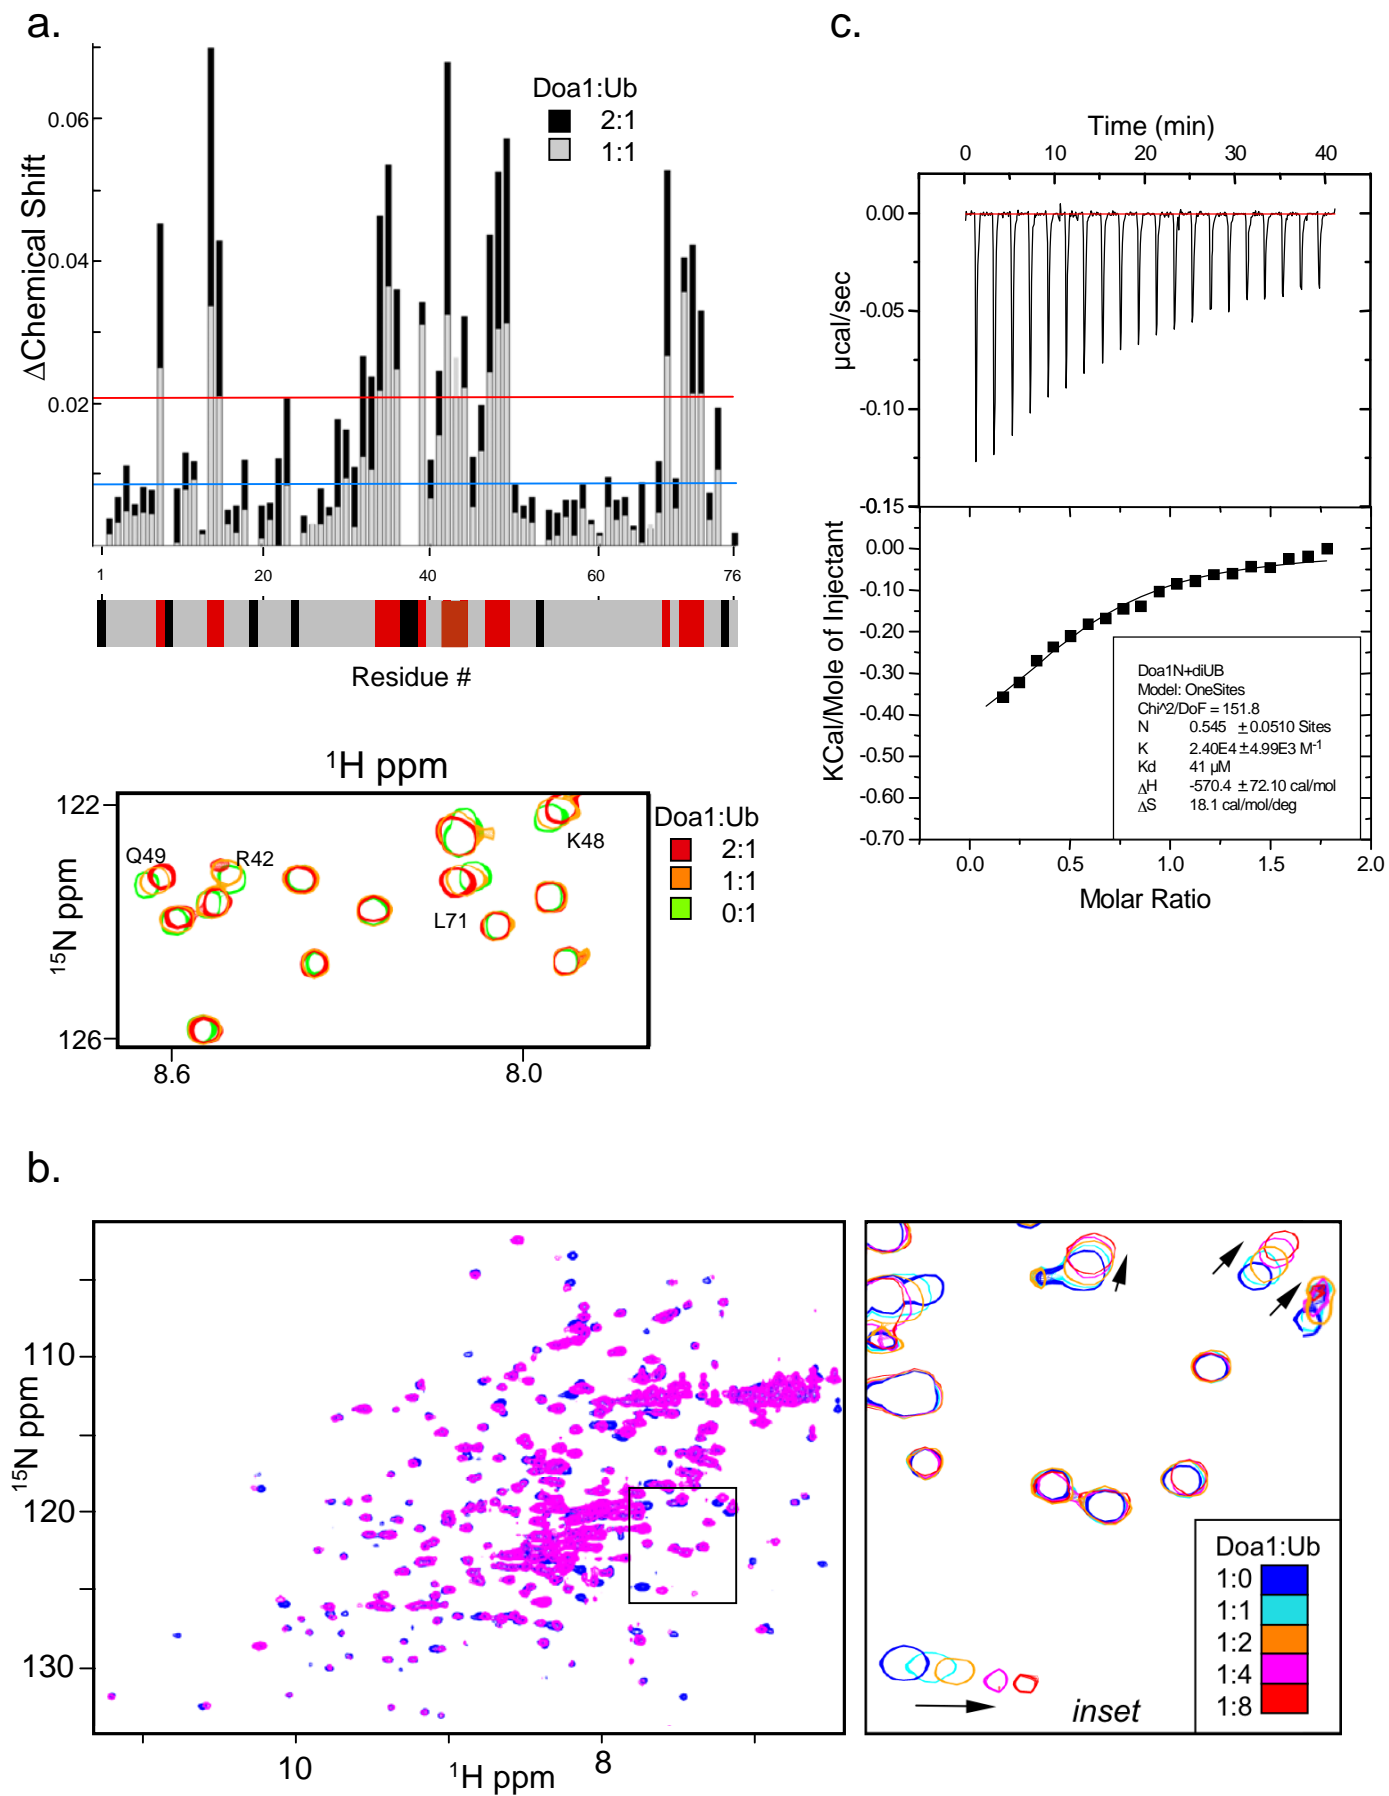

a.

### Structure of the Doa1 $\beta$ propeller

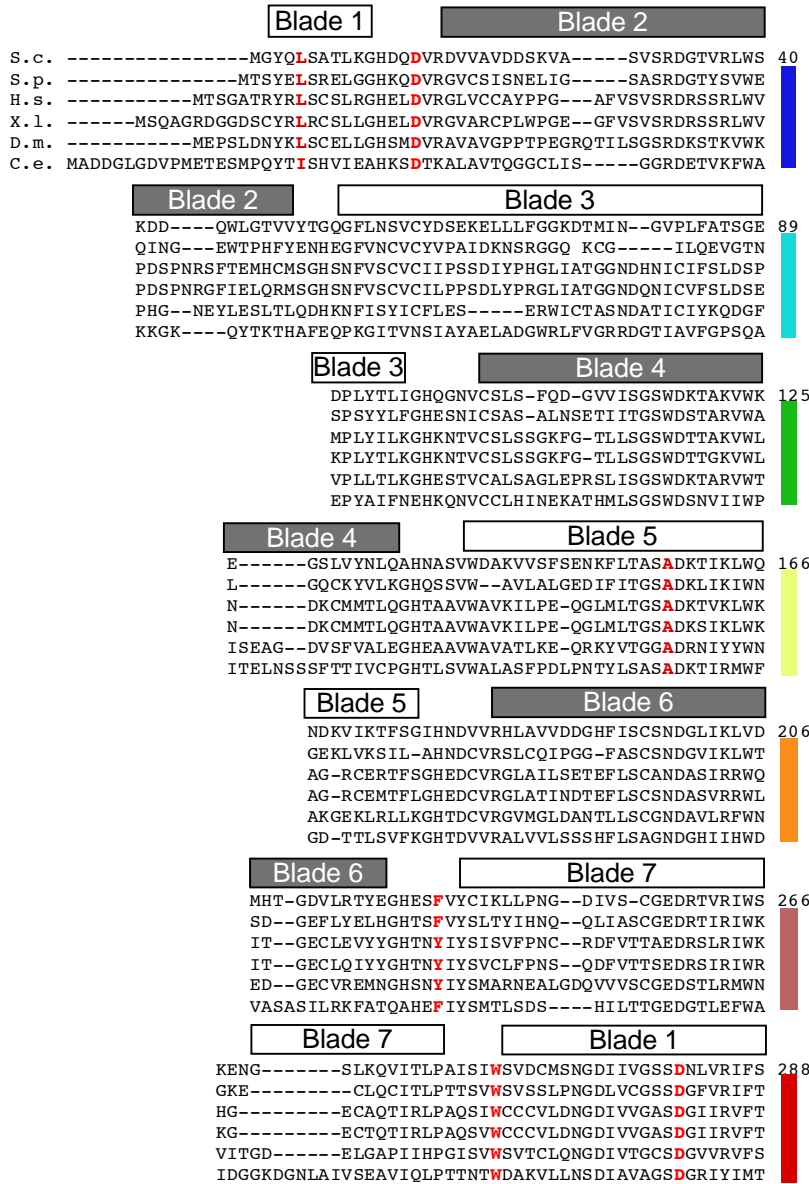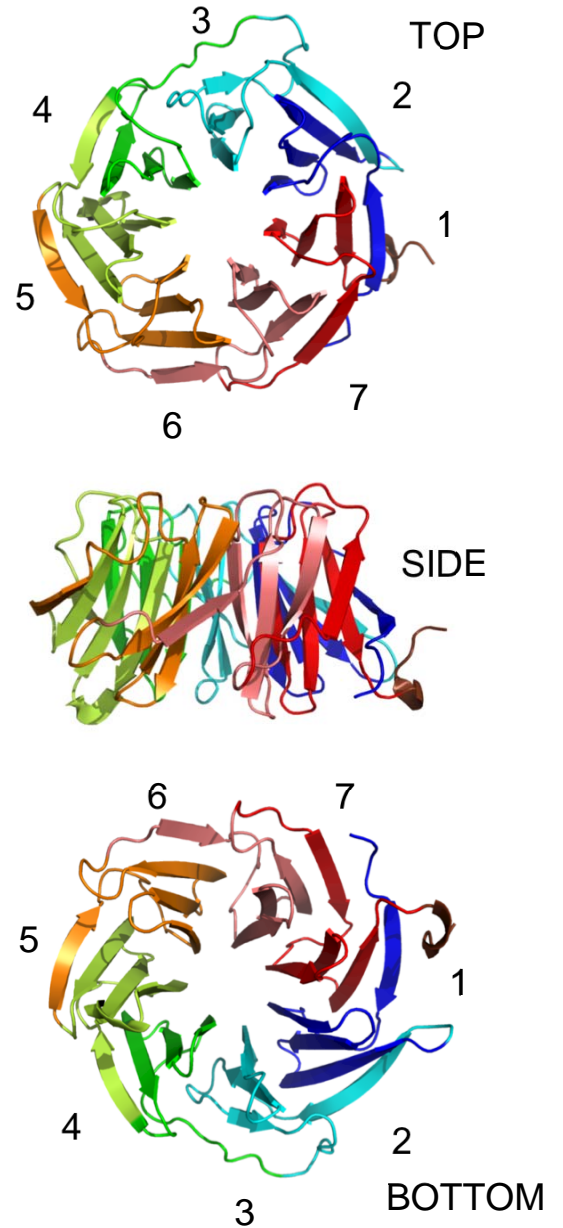

b.

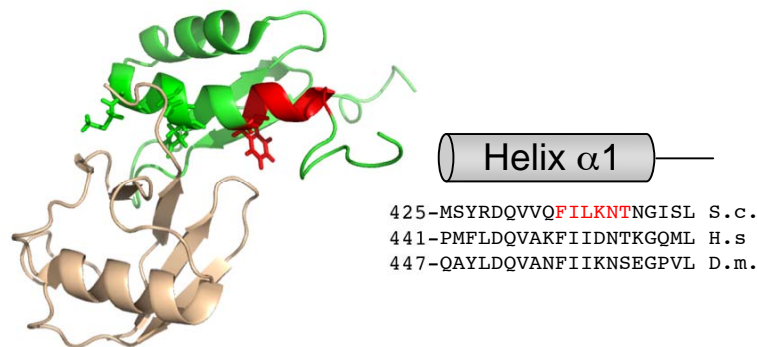

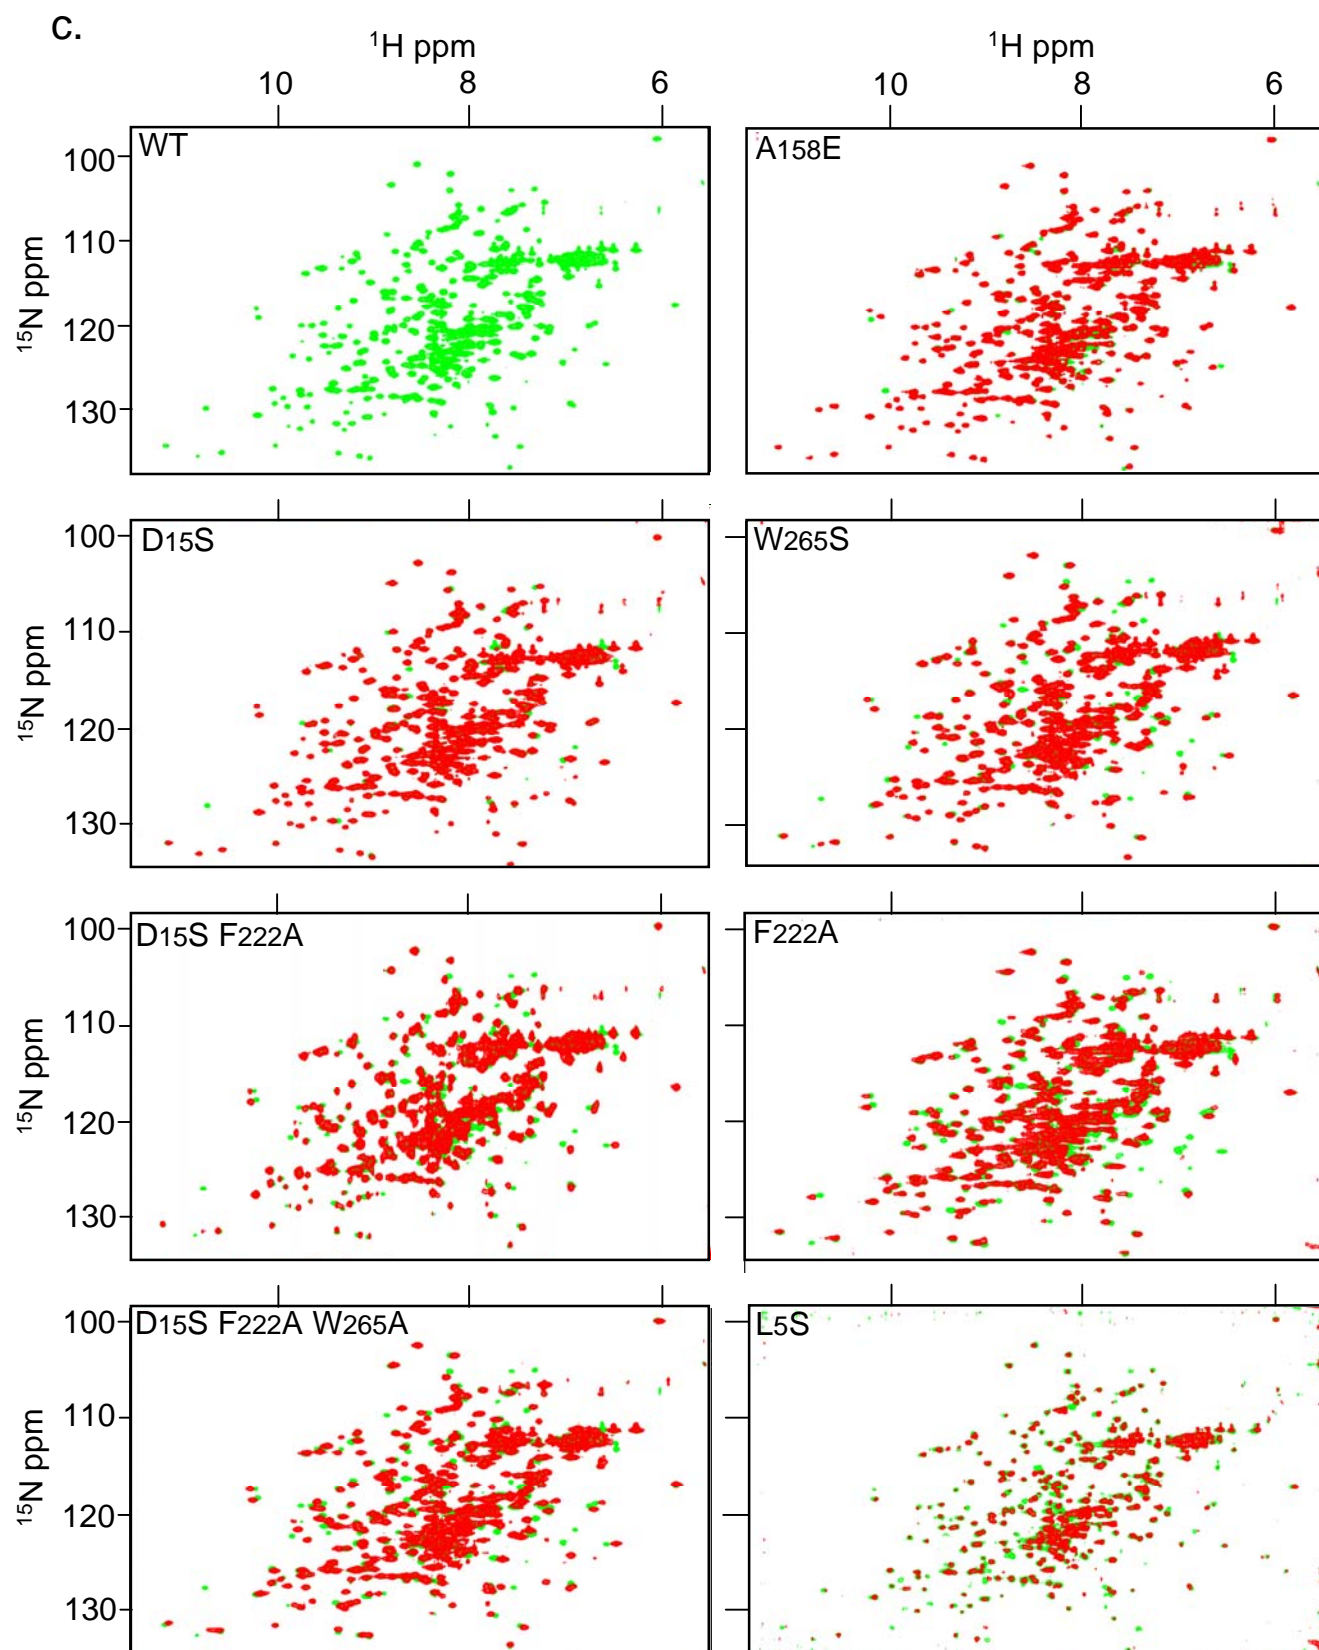

Ub-binding of  $\beta$ Prps expressed in yeast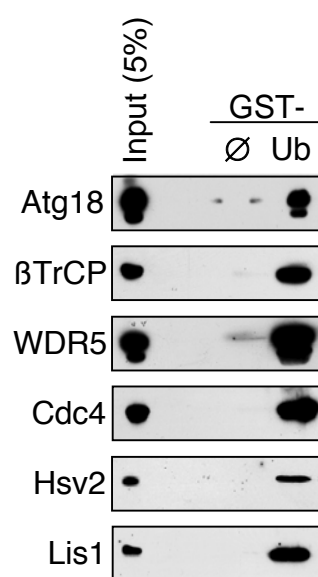

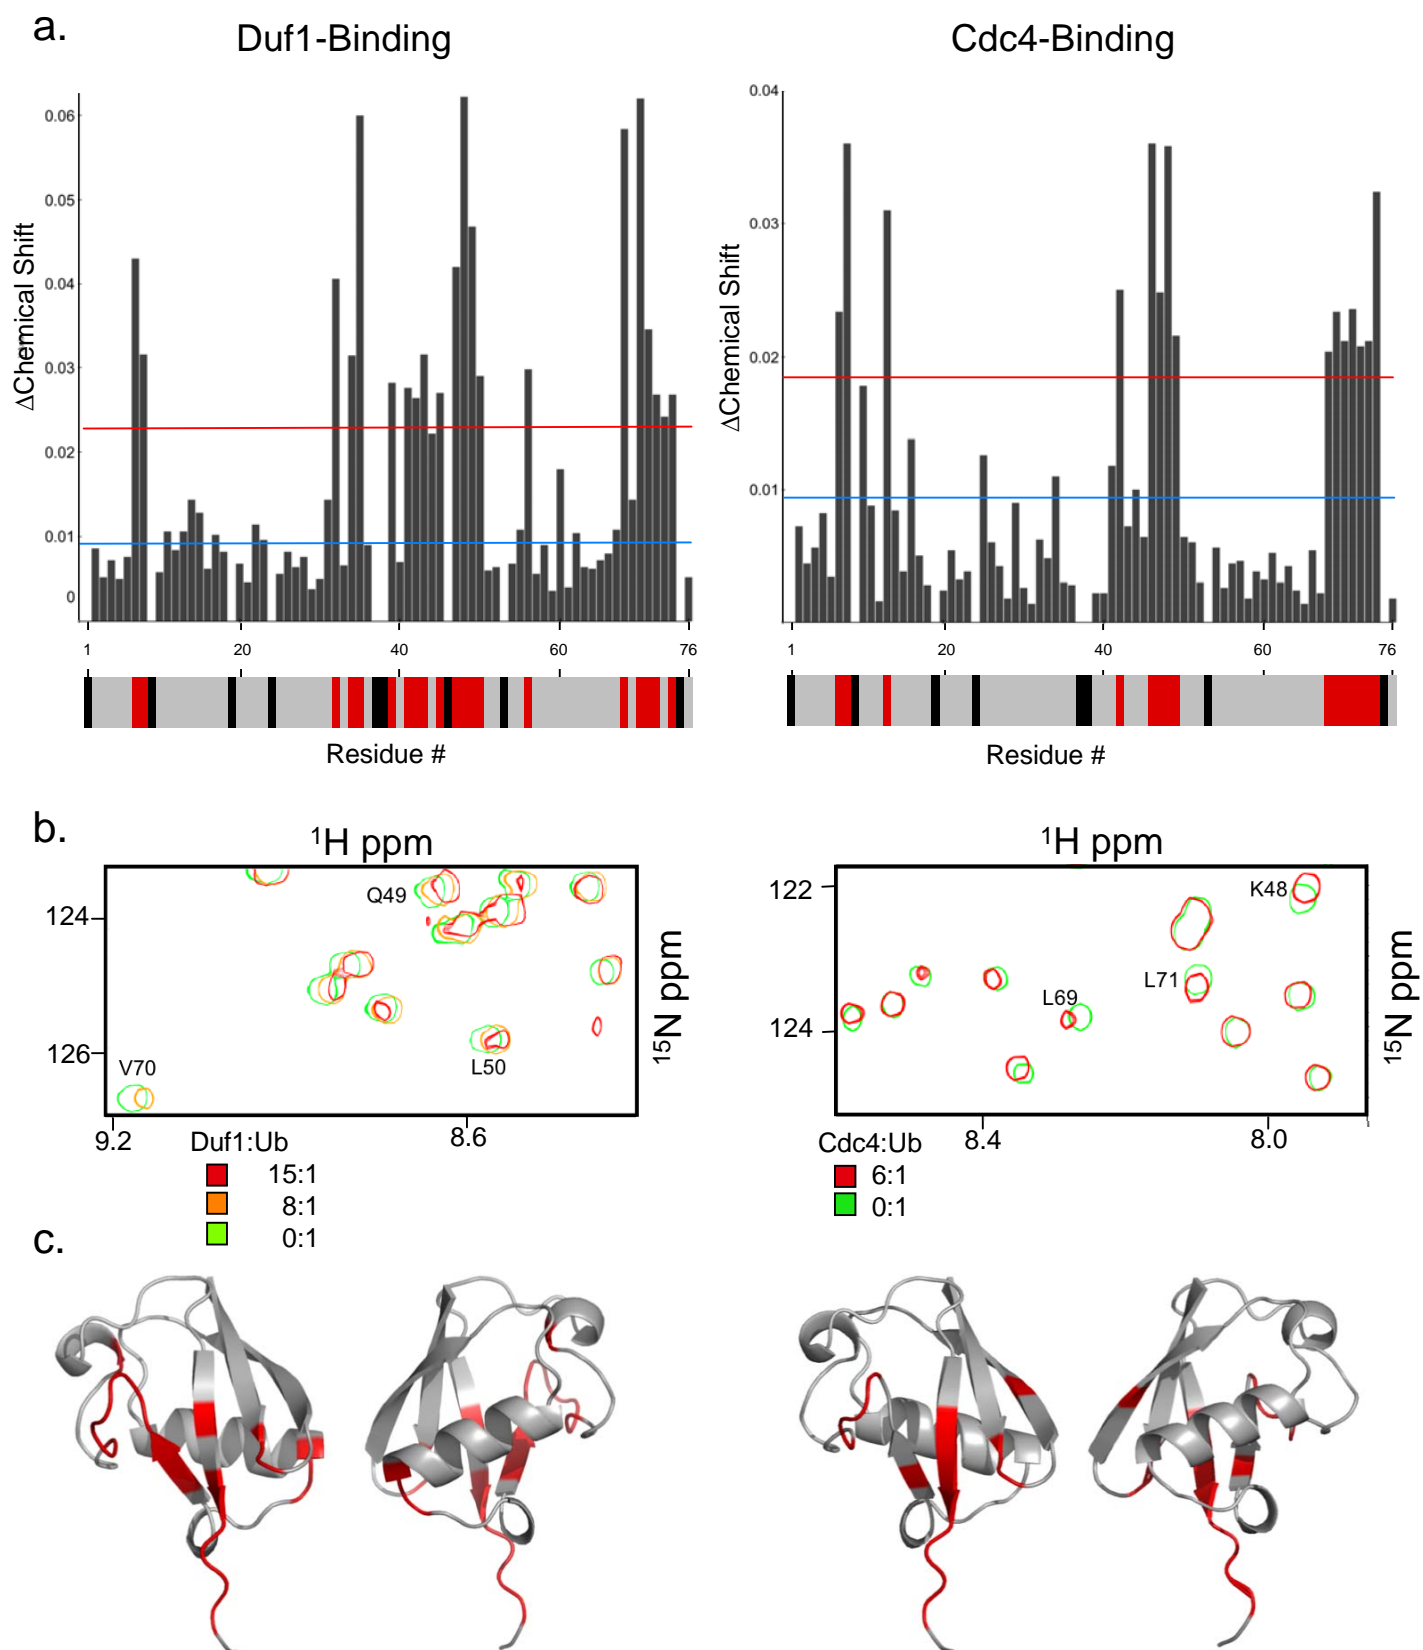

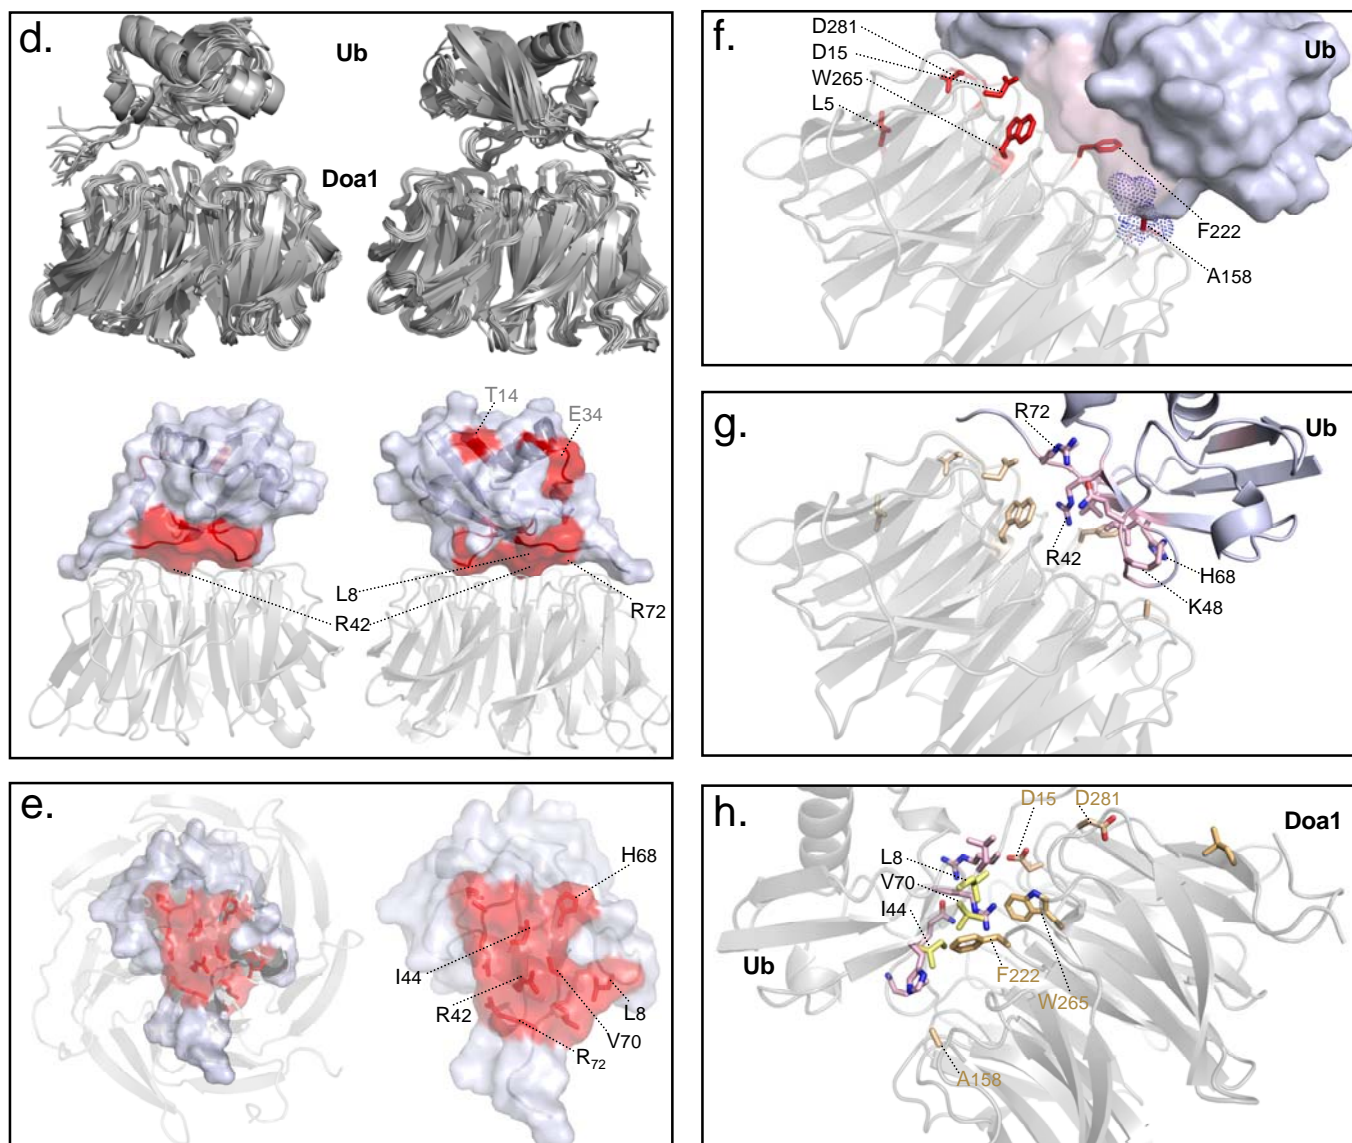

a.

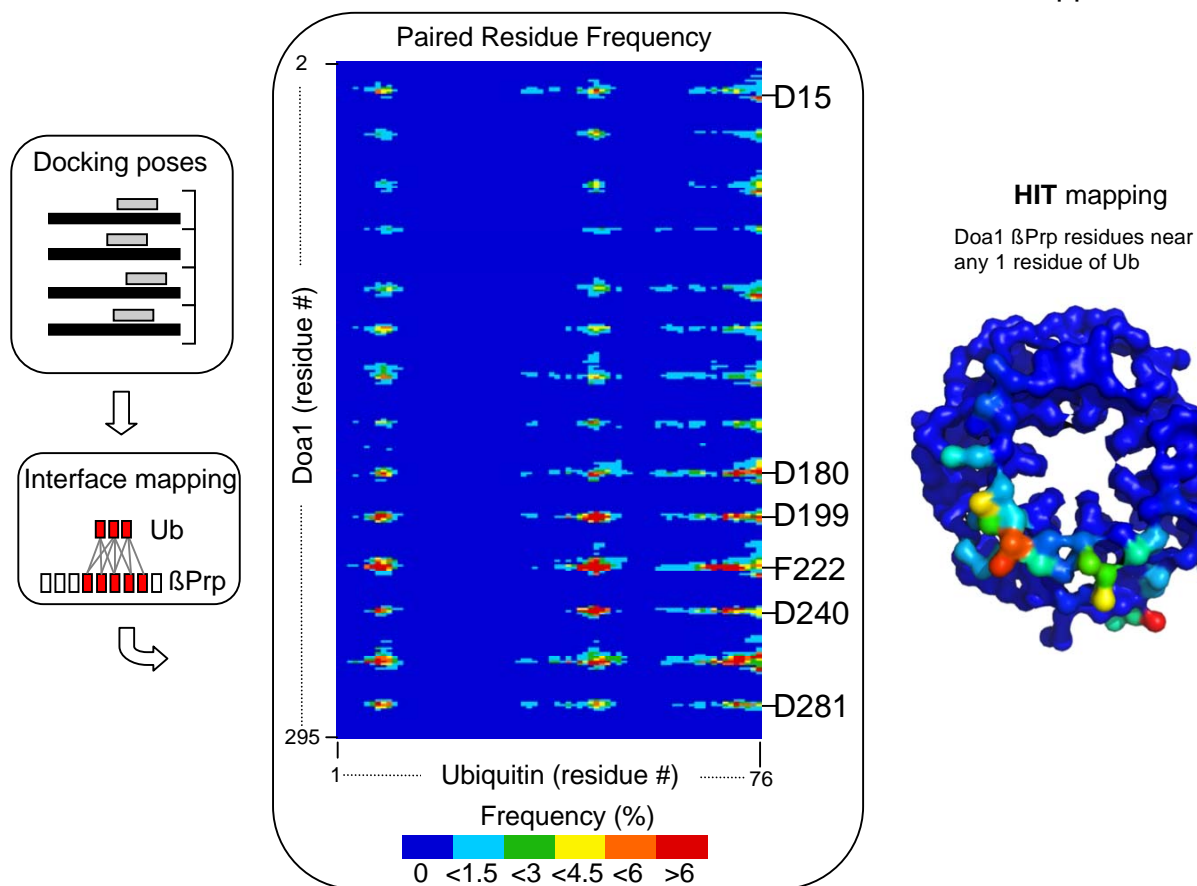

b.

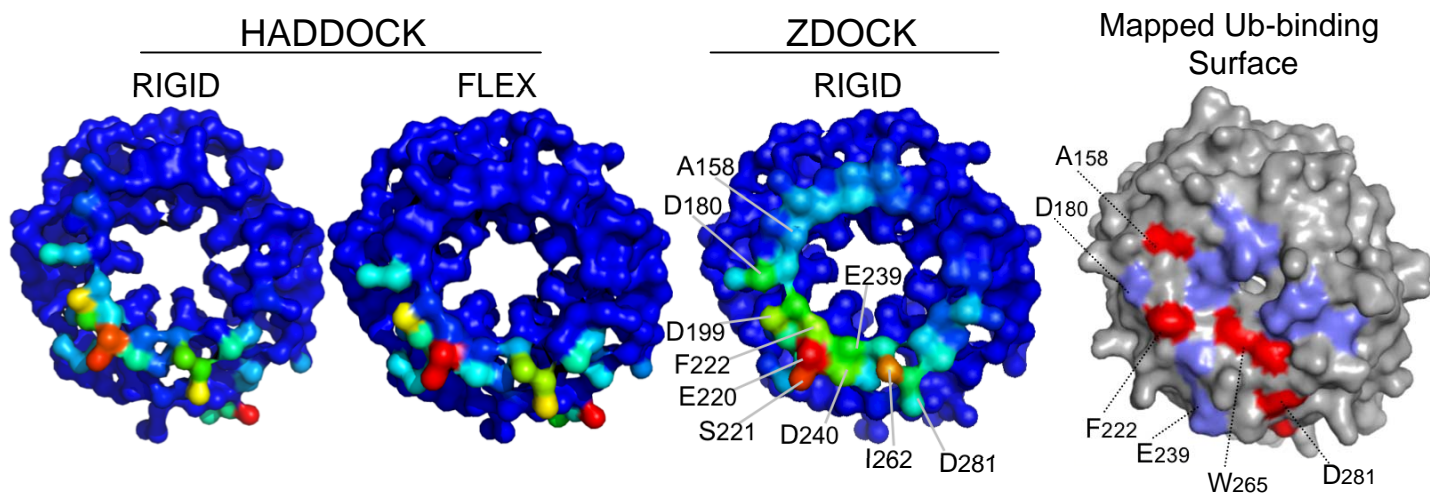

c.

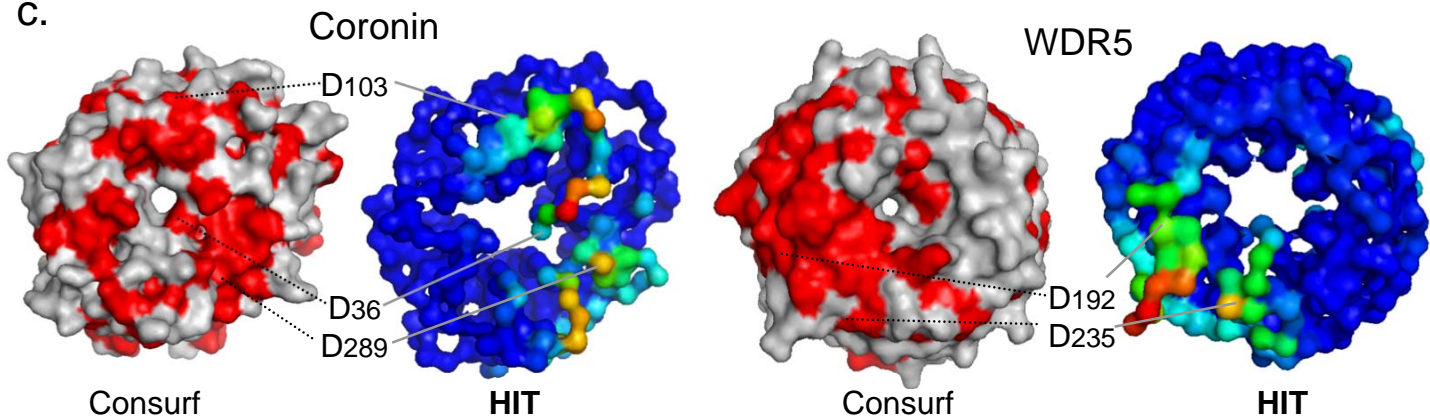

a.

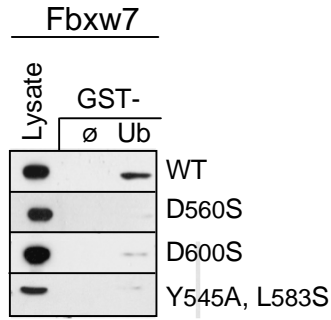

b.

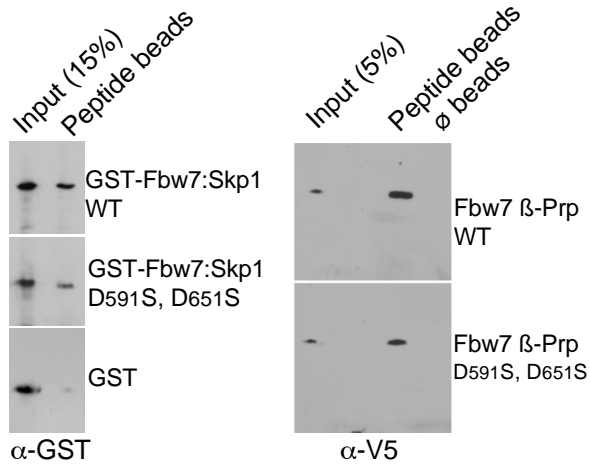

c.

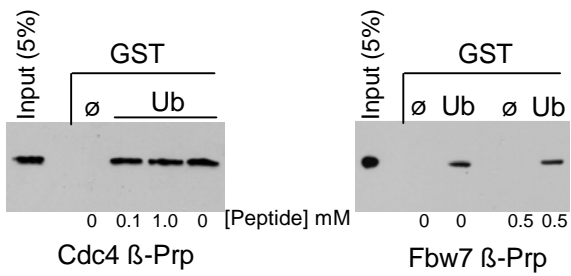

d.

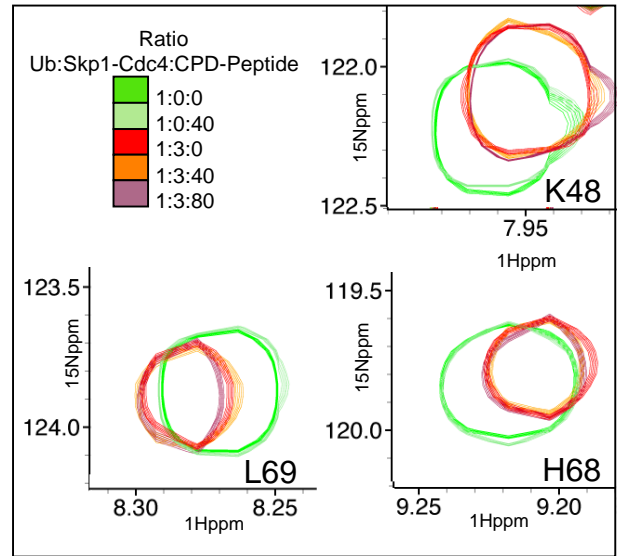

e.

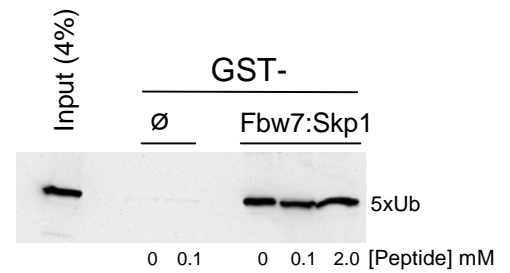

Supplement: NIHMS303829-supplement-Supplemental_Figs.pdf [file NIHMS303829-supplement-Supplemental_Figs.pdf]
